# Supplementary material for: Exploring in vitro expression and immune potency in mice using mRNA encoding the Plasmodium falciparum malaria antigen, CelTOS
Source: PubMed Central journal article supplement (PMC9798330; doi:10.3389/fimmu.2022.1026052), 2022-12-15
Supplement: DataSheet_1.pdf [file DataSheet_1.pdf]

Supplemental Figure 1.

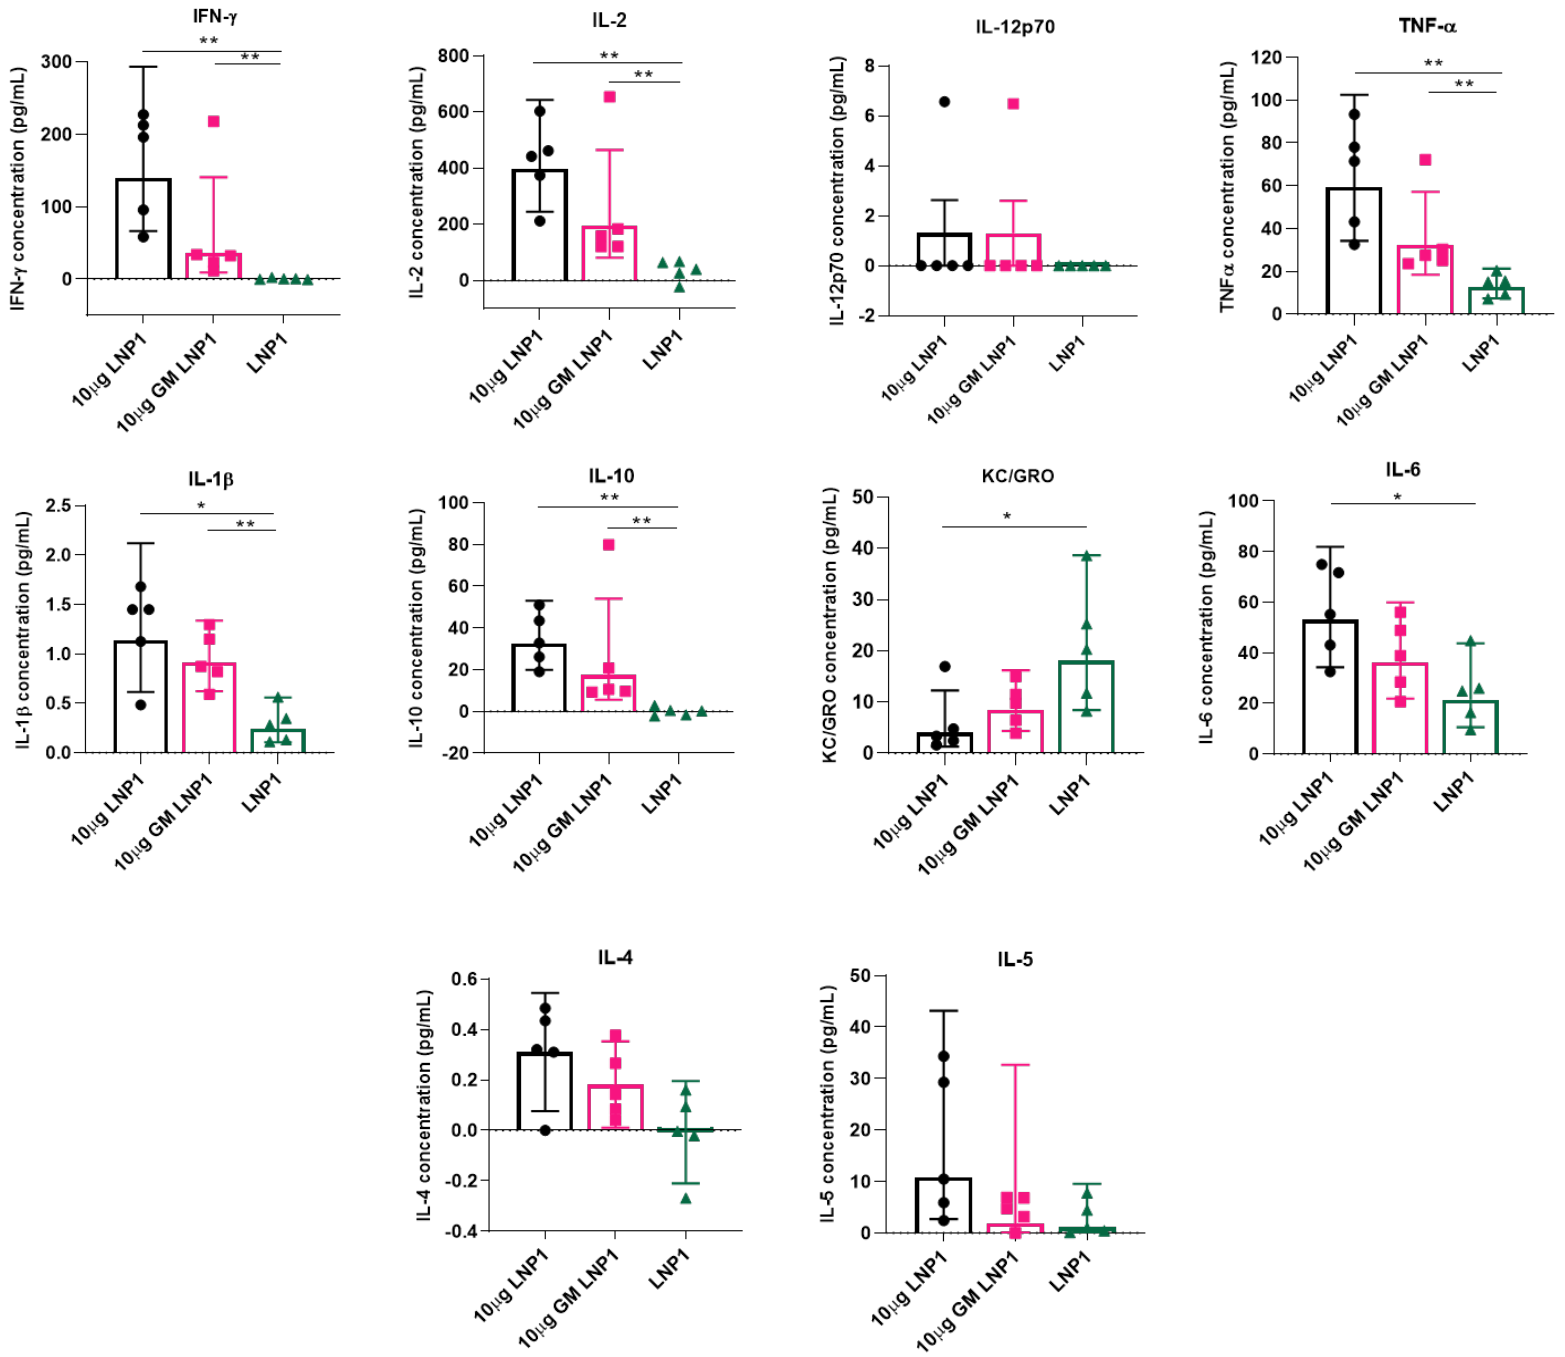

**Supplementary Figure 1.** Secreted cytokine concentrations from mice immunized with 10 $\mu$ g of *pfceltos* encapsulated in LNP1 or 10 $\mu$ g *pfceltos* with N-glycosylation site modified (GM) encapsulated in LNP1. Splenocytes were stimulated with 10 $\mu$ g/mL recombinant PfCelTOS protein. Cell culture supernatants were harvested after 48 hours and cytokine concentrations were quantified by Meso Scale Discovery (MSD) assay. Data is reported as the geometric mean and 95% confidence intervals. Statistical analysis was performed using a Mann-Whitney test (\*p<0.05, \*\*p<0.01).

## Supplemental Figure 2.

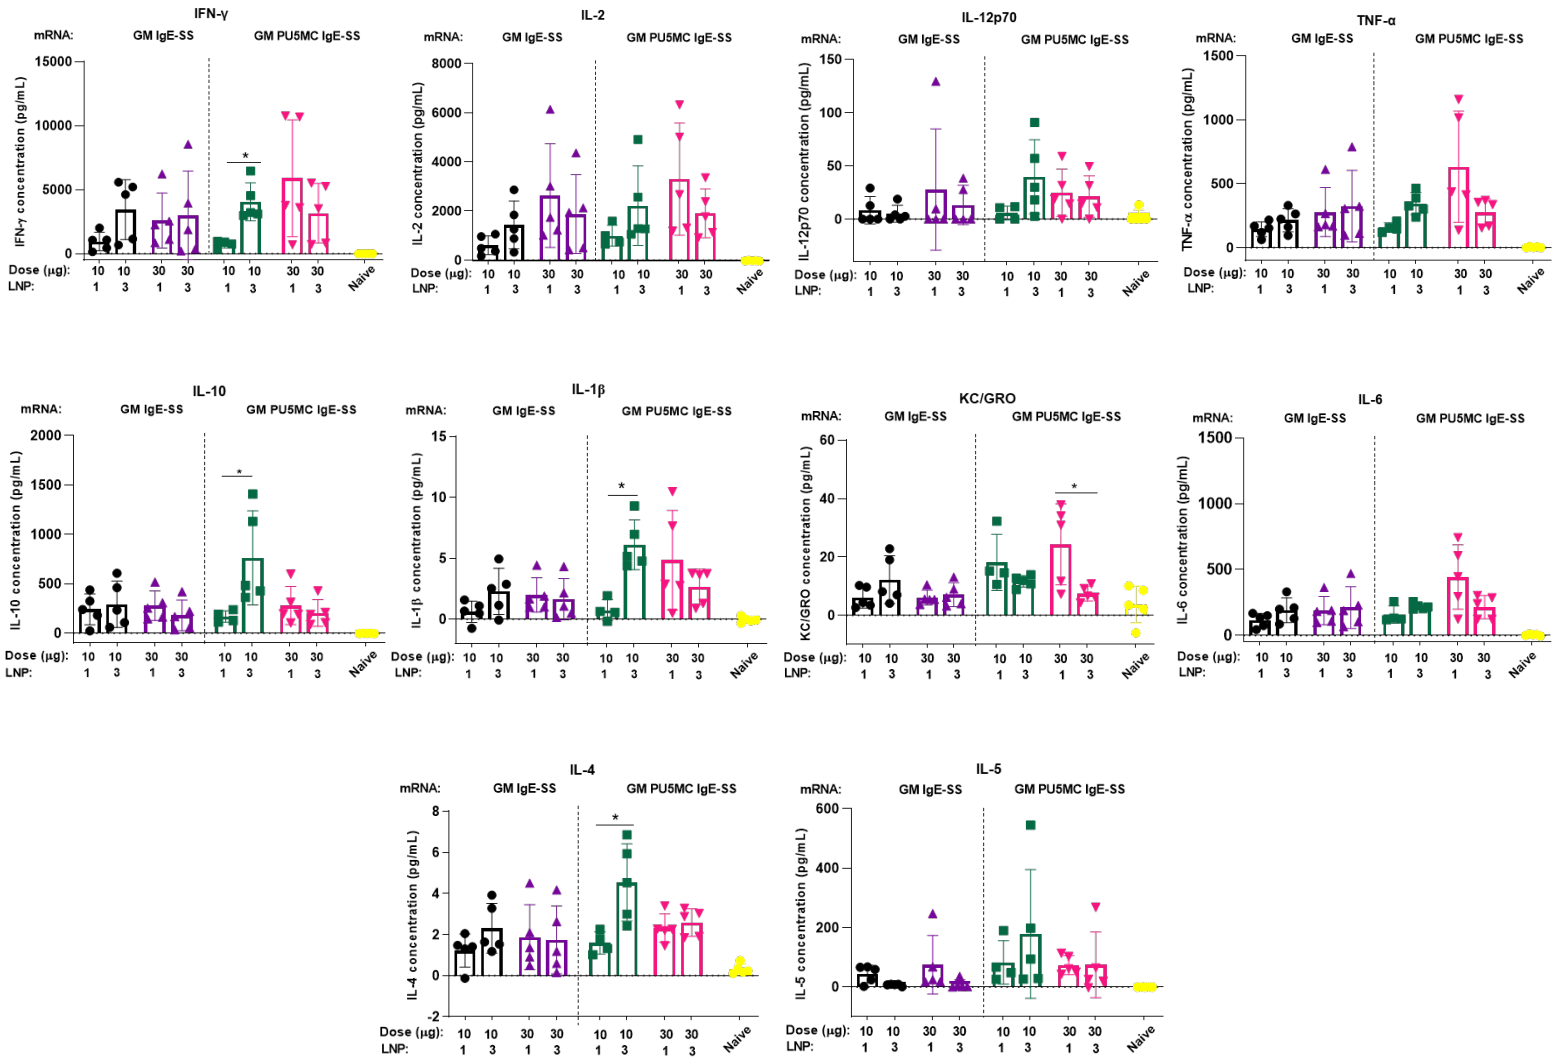

**Supplementary Figure 2.** Secreted cytokine concentrations from mice immunized with a low dose (10  $\mu$ g) or a high dose (30  $\mu$ g) of *pfceltos* Cap 1 with N-glycosylation site modified (GM) IgE-SS or *pfceltos* Cap 1 GM with nucleoside modifications of  $\psi$ -uridine-5'-methylcytosine (PU5MC) IgE-SS. Splenocytes were stimulated with a pool of PfcElTOS 15mer overlapping peptides (1  $\mu$ g/mL). Cell culture supernatants were harvested after 48 hours and cytokine concentrations were quantified by Meso Scale Discovery (MSD) assay. Data is reported with geometric mean and 95% confidence intervals. Statistical analysis was performed using a Mann-Whitney test (\* $p$ <0.05).

### Supplemental Figure 3.

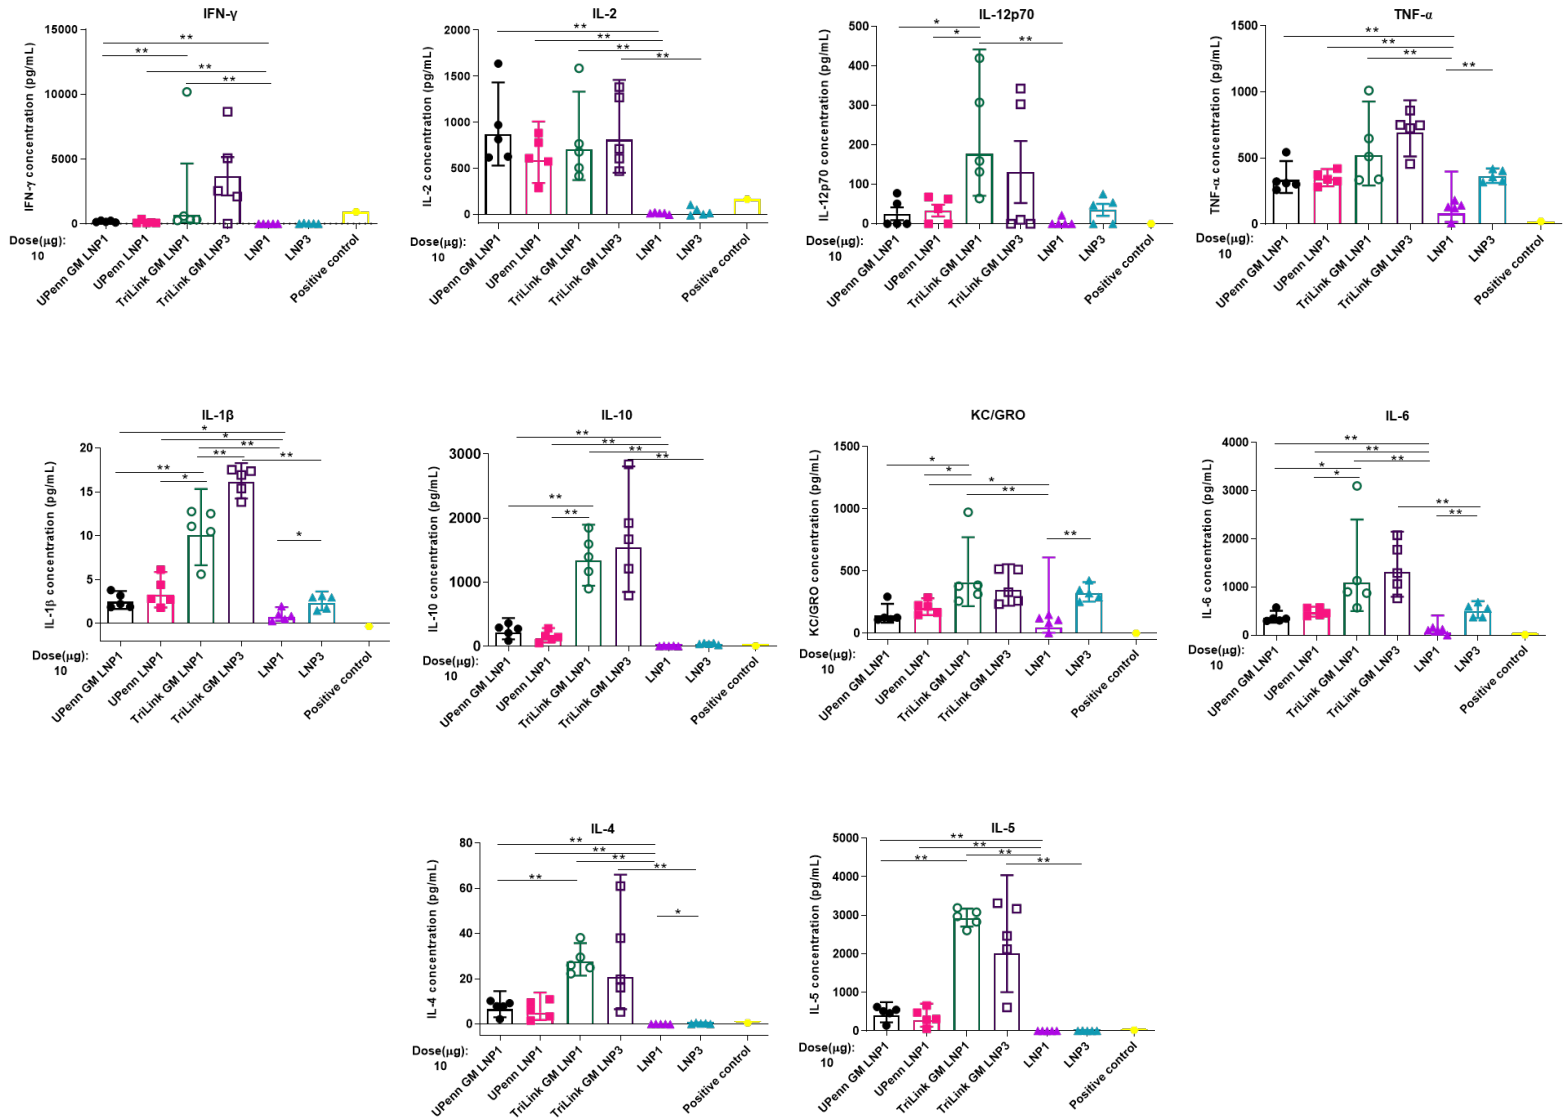

**Supplementary Figure 3.** Secreted cytokine concentrations by stimulated splenocytes from mice immunized with 10 $\mu$ g *pfceltos* University of Pennsylvania (UPenn) with N-glycosylation site modified (GM) embedded into LNP1 or 10 $\mu$ g of UPenn LNP1, 10 $\mu$ g *pfceltos* TriLink (TL) with N-glycosylation site modified (GM) embedded in either LNP1 or LNP3. Splenocytes were stimulated with a pool of PfCelTOS 15mer overlapping peptides at 1 $\mu$ g/mL. Cell culture supernatants were harvested after 48 hours and cytokine concentrations were quantified by MSD assay. Data are reported as the geometric mean and 95% confidence intervals. Statistical analysis was performed using a Mann-Whitney test (\*p<0.05; \*\*p<0.01).

**Supplemental Table 1.**

| <b>CeITOS Construct</b> | <b>Amino acid Length</b> | <b>Peptide Sequence</b>                                                                                                                                                 |
|-------------------------|--------------------------|-------------------------------------------------------------------------------------------------------------------------------------------------------------------------|
| Full Length             | 25-182                   | FRGNNGHNSSSSLYNGSQFIEQLNNSFTSAFLESQSMNKIGDDLAETISNELVSVLQKNSPTFLESSFD<br>IKSEVKKHAKLMFKELIKVGLPSVEKLVVAENVKPPKVDPATYGIIVPVLTSLFNKVETAVGANVSDEIWN<br>YNTSDVPESEENLSDDFFD |
| N-term                  | 25-149                   | FRGNNGHNSSSSLYNGSQFIEQLNNSFTSAFLESQSMNKIGDDLAETISNELVSVLQKNSPTFLESSFD<br>IKSEVKKHAKSMLKELIKVGLPSFENLVAENVKPPKVDPATYGIIVPVLTSLFNKV                                       |
| C-term                  | 85-182                   | PTFLESSFDIKSEVKKHAKSMLKELIKVGLPSFENLVAENVKPPKVDPATYGIIVPVLTSLFNKVETAVGA<br>KVSDEIWNYNSPDVSESEESLSDDFFD                                                                  |
| Peptide 1-2             | 25-60                    | FRGNNGHNSSSSLYNGSQFIEQLNNSFTSAFLESQS                                                                                                                                    |
| Peptide 2-3             | 41-85                    | GSQFIEQLNNSFTSAFLESQSMNKIGDDLAETISNEVSVLQKN                                                                                                                             |
| Peptide 4               | 150-182                  | VETAVGAKVSDEIWNYNSPDVSESEESLSDD                                                                                                                                         |

**Supplementary Table 1.** Amino acid sequences of the *Plasmodium falciparum* CeITOS full length, N-term, C-term recombinant proteins and Peptide 1-2, Peptide 2-3, and Peptide 4.
